# Supplementary material for: Automated Preparation of MS-Sensitive Fluorescently Labeled N-Glycans with a Commercial Pipetting Robot
Source: PubMed Central journal article supplement — SLAS Technol. 2018 Apr 4;23(6):550–9. doi: 10.1177/2472630318762384 (PMC6249649; doi:10.1177/2472630318762384), 2018-04-04
Supplement: DS_TECH762384.pdf [file DS_TECH762384.pdf]

# Automated Preparation of MS-Sensitive Fluorescently Labeled N-Glycans with a Commercial Pipetting Robot

Corey Reed

[corey\\_reed@waters.com](mailto:corey_reed@waters.com)

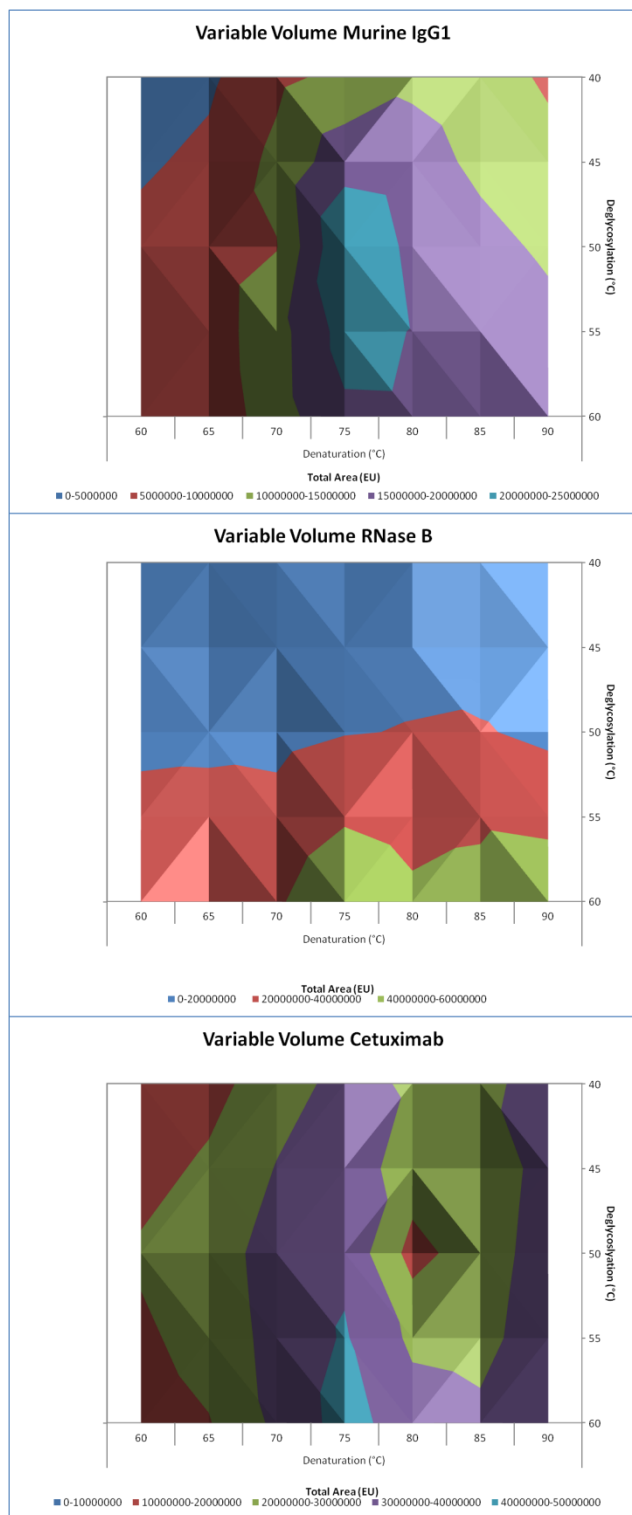

Supplementary Figure 1:

Variable volume protocol contour maps for the three proteins used during temperature optimization.

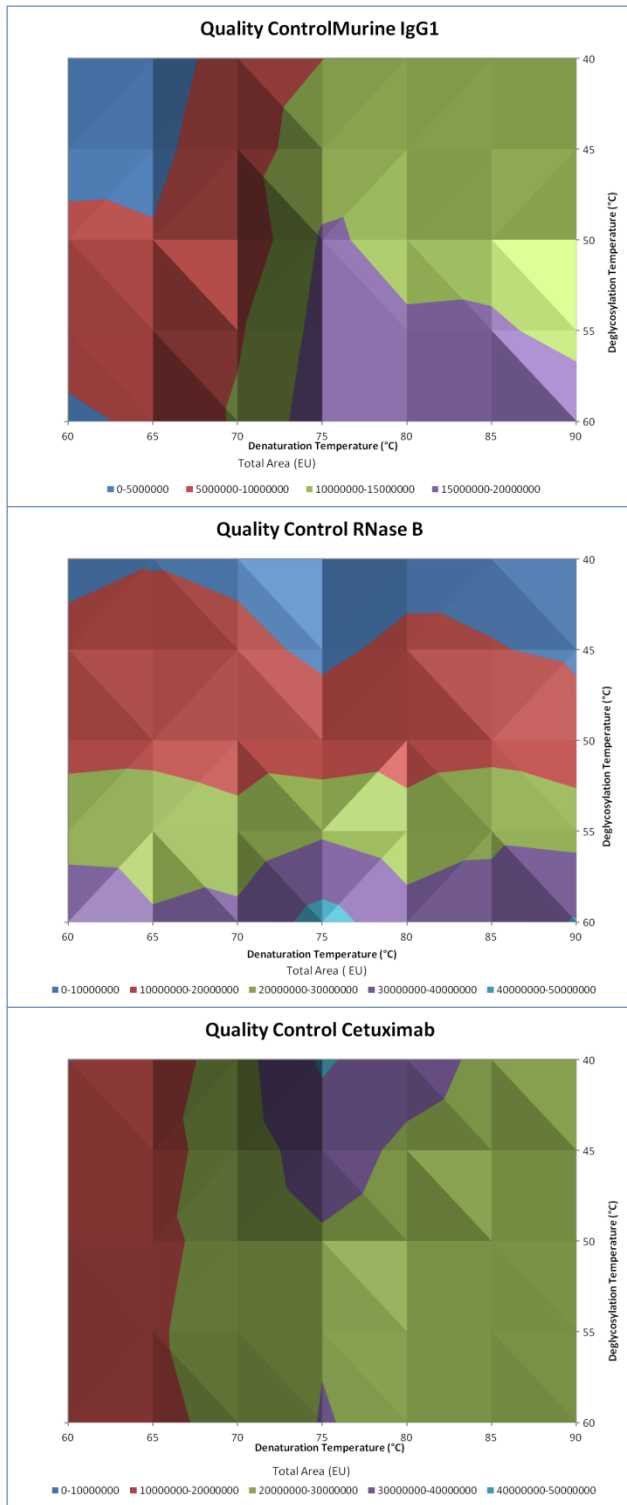

Supplementary Figure 2:

Quality control protocol contour maps for the three proteins used during temperature optimization.
